# Supplementary material for: NADH dehydrogenase of Trypanosoma brucei is important for efficient acetate production in bloodstream forms
Source: PubMed Central journal article supplement (PMC5225879; doi:10.1016/j.molbiopara.2016.10.001), 2017-01
Supplement: mmc1.pdf [file mmc1.pdf]

## Supplementary Material

### Supplemental Methods

*Transfection and Growth assays.* *T. brucei* bloodstream forms (BF) were grown in HMI-9 medium with 10% heat-inactivated fetal bovine serum at 37°C and 5% CO<sub>2</sub>. Drugs to maintain selection for transgenes were included when relevant: hygromycin (1 µg/ml), puromycin (0.1 µg/ml), blasticidin S (3 µg/ml) and phleomycin (1 µg/ml). BF were transfected using Amaxa Nucleofector program X-001 [1,2]. Briefly, 3X10<sup>7</sup> log phase BF cells were harvested by centrifugation and pellets were resuspended in 100 µl of Human T-cell Nucleofector solution plus 2-3 µg of DNA construct. Transfected cells were diluted 1:10 and 1:100 and incubated at 37°C for at least 6 h before adding appropriate drugs as described above. Protein expression from tetracycline (Tet)-regulated constructs was induced with 1 to 2 µg/ml of Tet. *In vitro* and *in vivo* growth analysis was carried as described [3].

*Conditional ndh2 knockouts in Lister 427 BF.* Primers are listed in Table S1. Deletion constructs were generated using plasmids pLew13 and pLew90 [4]. The regions targeting the drug resistance cassette were 500 bp region upstream of the *NDH2* coding sequence (CDS), Tb927.10.9440 (amplified using PCR primers 1 and 2 with NotI and MluI sites, respectively) and the last 456 bp from the 3' end of the *NDH2* CDS (amplified using primers 3 and 4, with XbaI and StuI sites, respectively). These regions were used to flank T7 RNA polymerase and *NEO* genes (first allele knockout) and the Tet repressor and *HYG* gene cassette (second allele knockout), as described [5]. For ectopic expression, V5-tagged NDH2 was generated by cloning the *NDH2* CDS into the pLew-3V5-PAC plasmid [3] via HindIII and BamHI sites (primers 17 and 18). Constructs were confirmed by restriction analysis and sequencing, and were digested with NotI before transfection.

*Null mutants in single marker BF and ndh2 cKOs in Δnubm BF.* A stitching PCR approach was employed to generate deletion constructs [6]. The constructs were designed such that drug resistance genes were flanked by regions upstream and the last 456 bp of the *NDH2* CDS. First, these regions were amplified from genomic DNA using Phusion polymerase system (Thermo) with an overhang (20 bp) of the sequence from drug resistance genes (*HYG*, *PHLEO* or *PAC*) (primers 5-10). CDSs for the drug resistance genes were also amplified using Phusion PCR system (primers 13-16). The first round amplicons were then stitched together in by amplification using primers situated at 5' end of the 5' UTR and 3' end of the 3'UTR (primers 11 and 12). The second round amplicons were then dA-tailed using GoTaq Polymerase (Promega), and cloned into pGEM-T Easy (Promega) vector. An ectopic copy of V5 tagged NDH2 was generated by cloning the *NDH2* CDS into pLew79-3V5-BSD, which was constructed by swapping the *PAC* gene from pLew79-NDH2-V5-PAC plasmid with the *BSD* gene from pLew100-V5-BSD (kind gift from George Cross) using SnaBI sites.

Initial confirmation of gene disruptions was done by PCR. Subsequent Southern analysis confirmation was performed as shown in the main text.

**Table S1. Primers**

| Primer                             | Name         | Sequence (5'-3')                                      | Use                           |
|------------------------------------|--------------|-------------------------------------------------------|-------------------------------|
| <u>Primers for NDH2 cKO</u>        |              |                                                       |                               |
| 1                                  | Ndh 5F       | ATGAGCGGCCGCATTTTATGTGTGAAGGGGAGG                     | Amplify 5' UTR                |
| 2                                  | Ndh 5R       | ATGAACGCGTCTCGAGACTTGTCTGTTTCAGATCTCCACT              | Amplify 5' UTR                |
| 3                                  | Ndh 3F       | ATATCTAGAATTTAAATCTGCTGTCGCTTCTCGTCA                  | Amplify 3' CDS end            |
| 4                                  | Ndh 3R       | ATAAGGCCTGCGGCCGCCTACTCGTTCTGTTTCTTTG                 | Amplify 3' CDS end            |
| <u>Primers for stitching KOs</u>   |              |                                                       |                               |
| 5                                  | Ndh 5F-642   | AGATATTGTCCGTA CTGCCTC                                | fusion 5' UTR                 |
| 6                                  | NDH 5R Phleo | <b>GAACGGCACTGGTCAACTTGGCCAT</b> CTTCCTTCTTTTTCTCCCTC | Fusion 5' UTR to <i>PHLEO</i> |
| 7                                  | NDH 5R PAC   | <b>GTGGGCTTGTACTCGGTAACCAT</b> CTTCCTTCTTTTTCTCCCTC   | Fusion 5' UTR to <i>PAC</i>   |
| 8                                  | NDH 3F Phleo | <b>GTGGCCGAGGAGCAGGACTGAGT</b> GAAAGTTTGTGTACCAAGCAAC | Fusion 3' UTR to <i>PHLEO</i> |
| 9                                  | NDH 3F PAC   | <b>GACCCGAAGCCCGGTGCCTGAGT</b> GAAAGTTTGTGTACCAAGCAAC | Fusion 3' UTR to <i>PAC</i>   |
| 10                                 | Ndh 3R+931   | AGAGGAGGCAAAAAGGTTCA                                  | Fusion 3' UTR                 |
| 11                                 | Ndh 5F-566   | TGTGTGAAAGGGAACGAAG                                   | Final fusion PCR              |
| 12                                 | Ndh 3R+856   | GAGAGTGCGCCAGTGTCTATC                                 | Final fusion PCR              |
| 13                                 | Phleo F ATG  | ATGGCCAAGTTGACCAAGTCCGTTTC                            | Amplify resistance gene       |
| 14                                 | Phleo R Stop | TCAGTCTGCTCCTCGGCAC                                   | Amplify resistance gene       |
| 15                                 | PAC F ATG    | ATGGTTACCGAGTACAAGCCAC                                | Amplify resistance gene       |
| 16                                 | PAC R Stop   | TCAGGCACCGGGCTTGC GGTC                                | Amplify resistance gene       |
| <u>Primers for complementation</u> |              |                                                       |                               |
| 17                                 | Ndh2 Hind F  | ATGCAAGCTTATGATATGCCGCACATCTT                         | Cloning Gene                  |
| 18                                 | Ndh2 Bam R   | GCATGGATCCCTCGTTCTGTTTCTTTGTCTG                       | Cloning Gene                  |

Restriction sites added for cloning are underlined. Bases in bold anneal with the drug resistance genes in the fusion PCR, while standard font matches *NDH2* flanking sequence. In the primer names, negative numbers indicate nt upstream of *NDH2* start codon (forward) and positive number indicate position downstream of *NDH2* stop codon (reverse primers).

## References

- [1] Burkard G, Fragoso CM, Roditi I. (2007) Highly efficient stable transformation of bloodstream forms of *Trypanosoma brucei*. *Mol Biochem Parasitol* 153: 220-3.
- [2] Cross GAM. Tools for genetic analysis in *Trypanosoma brucei*. Available from URL: [http://tryps.rockefeller.edu/trypsr2\\_protocols\\_index.html](http://tryps.rockefeller.edu/trypsr2_protocols_index.html)
- [3] Surve S, Heestand M, Panicucci B, Schnauffer A, Parsons M. (2011) Enigmatic presence of mitochondrial complex I in *Trypanosoma brucei* bloodstream forms. *Eukaryot Cell* 11: 183-93.
- [4] Wirtz E, Leal S, Ochatt C, Cross GA. (1999) A tightly regulated inducible expression system for conditional gene knock-outs and dominant-negative genetics in *Trypanosoma brucei*. *Mol Biochem Parasitol* 99: 89-101.
- [5] Ochatt CM, Butikofer P, Navarro M, Wirtz E, Boschung M, Armah D, et al. (1999) Conditional expression of glycosylphosphatidylinositol phospholipase C in *Trypanosoma brucei*. *Mol Biochem Parasitol* 103: 35-48.
- [6] Merritt C, Stuart K. (2013) Identification of essential and non-essential protein kinases by a fusion PCR method for efficient production of transgenic *Trypanosoma brucei*. *Mol Biochem Parasitol* 190: 44-9.

## Supplementary Figures

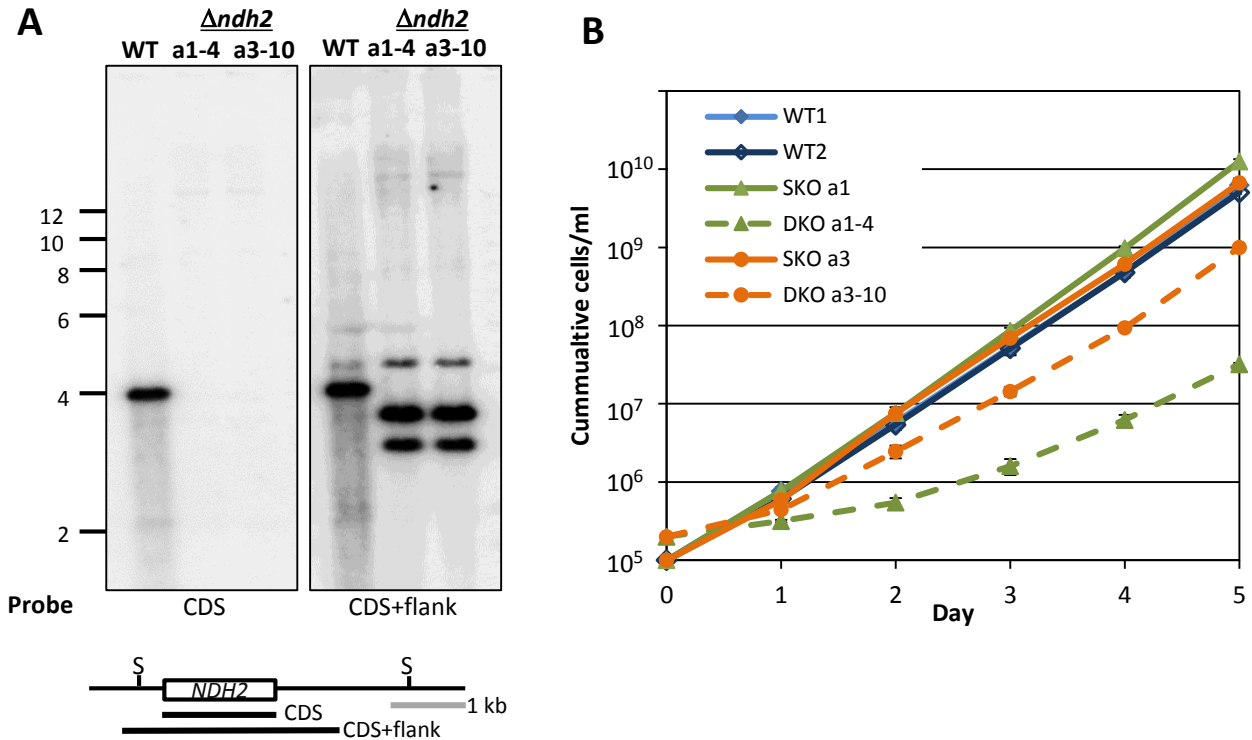

**Fig. S1. Generation and growth analysis of  $\Delta ndh2$  cell lines.** (A) Genomic Southern blot of  $\Delta ndh2$  clones. Genomic DNA was digested with *Sna*BI (S), fractionated by agarose gel electrophoresis, transferred to a membrane and probed with a fragment consisting of either the coding sequence (CDS) alone or the CDS plus 5' and 3' flanking regions (CDS+flank) as shown below. Expected sizes for the CDS probe are: WT, 3.6 kbp;  $\Delta ndh2$  clones a1-4 and a3-10, no band. For the 'CDS+flank' probe expected sizes are: WT, 3.6 and 4.1 kbp;  $\Delta ndh2$  clones, 2.5, 2.7, and 4.1 kbp. (B) Growth curve of  $\Delta ndh2$  (DKO) mutants compared to their parental single knockout clones (SKO) and the parental single marker line (WT). The curve shows the cumulative cell concentration per ml with error bars marking the standard deviation of the triplicate data points. This experiment was conducted at 46 days of culture post-transfection.

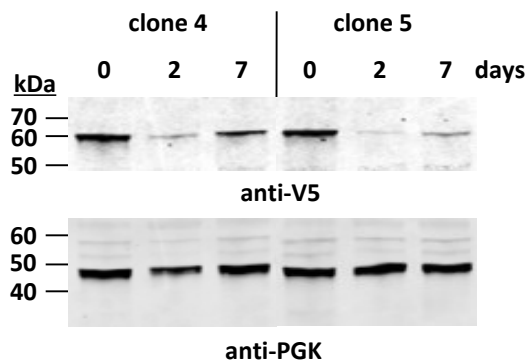

**Fig. S2. Re-expression of NDH2-V5 in the  $\Delta ndh2$  cKO clones several days after Tet withdrawal.** Western blot analysis showing that after withdrawal of Tet, NDH2-V5 expression had strongly decreased by day 2 as compared to day 0, but increased again at later time points. The same blot was re-probed with anti-PGK as loading control. The samples analyzed here were derived from a repeat of the growth experiment shown in Fig. 1E. Proliferation slowed from day 1 to day 3 and then recovered to near normal rates by day 5.
